# Supplementary material
Source: publisher figshare collection journal article supplement (https://tandf.figshare.com/ndownloader/files/13776455)
Supplement: Supplementary file 1 [file 13776455]

## Sheet: PFP
Title	Author	Date	Study Type	PEDro Score	Category	Devices	subjects (N)	recruitment setting	inclusion	exclusion	intervention/methods for primary GT outcomes	comparison groups	# of visits & length of intervention	comparative measures relevant to GT	main findings
Gait retraining versus foot orthoses for patellofemoral pain: a pilot randomised clinical trial.	Bonacci et al	2018	pilot RCT	7	auditory feedback: cadence	metronome	14 PFP runners ; male and female	recreational community centers	aged 18–40 years; anteropatella or retropatella pain that was non-traumatic, longer than six weeks duration and provoked by jogging/running or squatting, hopping/jumping or kneeling or prolonged sitting; worst pain over the previous week of at least 30/100 mm on a visual analogue scale; running at least 10 km per week; tender over the patellar facet; pain on step-down from a 25-cm step or during …	concomitant injury or pathology of other knee structures; a history of knee surgery; any foot condition that precludes the use of foot orthoses or running in a minimalist shoe; a his- tory of use of foot orthoses or minimalist footwear; pain in and/or referred pain from the hip or lumbar spine.	Gait training group: minimalist shoe with 10% increase in running cadence. Instructed to land softly. Cadence feedback given with metronome on treadmill, and comprised 20% total runs. Week 1: 50/50 walk/run FB week 2: 40/60 FB week 3: 30/70 FB week 4: 20/80 FB week 5: 10/90 one FB week 6: full run, no FB	Foot orthoses group: wore pre-fabricated orthoses during normal training	intervention: 10 gait sessions for 6 weeks examination: baseline to 12-week f/u	anterior knee pain scale, VAS worst pain, VAS average pain	GT had significant pain improvement for the AKPS and worst pain, and had all more favorable pain outcomes than orthoses (AKPS +17.21, worst pain -3.864, avg pain -1.221)
Is combining gait retraining or an exercise programme with education better than education alone in treating runners with patellofemoral pain?A randomised clinical trial	Esculier et al	2017	RCT	8	verbal feedback: cadence/ footstrike	verbal FB only	69 PFP runners (20 group 1, 21 group 2, 18 group 3) 10 drop-outs ; male and female	city running community	aged 18–45 years; run ≥ 15 km per week; report PFP for a duration of 3 months ; report pain level ≥ 3/10 on a visual analog scale during running and during three activities among: kneeling, squatting, stairs and resisted knee extension ; score a maximum of 85% on the Knee Outcome Survey – Activities of Daily Living Scale (KOS-ADLS)	pain originating from menisci or primarily from the patellar tendon ; pain following an acute trauma ; injuries other than PFP or history of lower limb surgery or neurological, inflammatory or degenerative disease	group 3: education (see comparisons) + gait training --> 10 min treadmill session w/ physio every visit, increase step rate 7.5-10%, and if needed, told to run softer or to adapt a non-rearfoot strike pattern	all groups:education to keep pain at VAS 2/10 or lower, increase weekly training frequency, decrease session speed/duration, avoid downhill/stairs, and gradually increase mileage; group 1: education alone group 2: education+exercise --> 3 to 4 exercises performed 3xwk 20 mins, and lower limb control exercise daily	intervention: 8 weeks, 5 supervised sessions. Examination: 8 wk	VAS pain and KOS-ADL questionnaires, camera-based eval of treadmill running kinetics and kinematics (step rate, AVLR, PFP joint forces, distance)	all groups improved pain and KOS-ADL ; gait retraining group increased step rate by 7% (p<0.001), knee loading rate decreased by 12.5% from baseline to follow-up. All groups improved with pain and self-reported outcomes from baseline to f/u
The influence of cadence and shoes on patellofemoral joint kinetics in runners with patellofemoral pain	Bonacci et al	2017	within-participant repeated measures	6	auditory feedback: cadence (+ footwear)	metronome	15 PFP runners ; male and female	university setting	aged 18–40 years; running at least 10 km per week; non-traumatic retropatellar pain of greater than 6 weeks duration; aggravated by at least two of: running, hopping, squatting, prolonged sitting or kneeling; pain severity ≥30/100 mm on a visual analogue scale; pain on palpation of the patellar facet or during a double leg squat or step down from a 25 cm step.	concomitant injury or pathology of other knee structures (e.g. menisci, liga- mentous, patellar tendon, iliotibial band); a history of lower limb surgery; pain or injury in the hip, pelvis or lumbar spine; any foot condition that precluded use of a minimalist shoe.	all participants received 4 conditions: 1) regular shoe at preferred run cadence 2) regular shoe w/ 10% run cadence increase 3) minimalist shoe at preferred run cadence 4) minimalist shoe at 10% run cadence increase. Feedback given with metronome on treadmill	within-subject comparison	intervention: 1 visit only examination: immediate effects	peak knee joint stress, peak knee joint reaction force, peak knee extensor moment, peak knee flexion angle	all conditions decreased knee joint reaction forces and peak knee flexor moments and angles. Minimalist shoe + increased cadence had the most pronounced effects. In regular shoes w/ increased cadence compared to baseline: (peak knee stress -0.69, peak joint rxn -0.68, peak extensor moment -0.61, peak knee flexion -0.50)
Gait Retraining From Rearfoot Strike to Forefoot Strike does not change Running Economy.	Roper et al	2017	RCT	7	visual feedback (mirror) and verbal feedback: footstrike	mirror	16 PFP rearfoot strike runners ; male and female	recreational community centers	typical knee pain levels during and/or after running was at least ‘3’ and no more than ‘7’ on a ‘0’ to ‘10’ visual analog scale; pain in the patellofemoral region in one or both limbs; pain also occurred during one of the following activities: kneeling, squatting, prolonged sitting, and stair ascent/descent; physical exam ruled out any ligamentous instability, patellar tendinitis, neurological is…	pregnancy; history of any cardiovascular issues within the past year or a history of knee surgery on the a ected limb; traumatic patellar dislocation and/or any neurological disorders that would influence gait	gait training group: treadmill running w/ metabolic cart in front of mirror, verbal instruction to land on balls of feet/run on toes	control group: run normally on treadmill w/ metabolic cart in front of mirror, no verbal instruction	intervention: 8 sessions for 2 weeks examination: baseline to 2 weeks and 1 month f/u	step frequency, stride length, contact time, VAS (outcomes measured during overgroup running)	gait training group had significantly decreased VAS scores (-40mm at 2 weeks and 1 month from baseline), however all other outcomes were not significant
The effects of gait retraining in runners with patellofemoral pain: A randomized trial	Roper et al	2016	RCT	7	visual feedback (mirror) and verbal feedback: footstrike	mirror	16 PFP rearfoot strike runners ; male and female	recreational community centers	typical knee pain levels during and/or after running was at least ‘3’ and no more than ‘7’ on a ‘0’ to ‘10’ visual analog scale; pain in the patellofemoral region in one or both limbs; pain also occurred during one of the following activities: kneeling, squatting, prolonged sitting, and stair ascent/descent; physical exam ruled out any ligamentous instability, patellar tendinitis, neurological is…	pregnancy; history of any cardiovascular issues within the past year or a history of knee surgery on the a ected limb; traumatic patellar dislocation and/or any neurological disorders that would influence gait	gait training group: treadmill running in front of mirror, verbal instruction to land on balls of feet/run on toes	control group: run normally on treadmill in front of mirror, no verbal instruction	intervention: 8 sessions for 2 weeks examination: baseline to 2 weeks and 1 month f/u	knee flexion IC, knee flexion max, knee ROM, knee abd at IC, ankle flexion at IC, ankle flexion max, ankle ROM, knee extensor moment at max and IC, plantarflexion moment at max and IC, VAS, patellofemoral contact force, patellofemoral stress, achilles tendon force	GT had significantly improved knee abd and inc ankle ROM at 2 wks and 1 month, significant differences in ankle flexion at 2 wks, no significant findings in other metrics; compared to control: significant findings in knee flexion at IC at 2 wks, and for both timepoints for knee abd, ankle angle at IC, and ankle loading
The Effects of a Multimodal Rehabilitation Program on Symptoms and Ground-Reaction Forces in Runners With Patellofemoral Pain Syndrome	Esculier et al	2016	pre-post design	5	verbal feedback: cadence/ footstrike	verbal FB only	21 PFP runners ; sex not specified	community runners	age 18 to 45 ; running at least 15 km/wk ; reporting symptoms for at least 3 months ; maximum score of 85% on the Activities of Daily Living Scale of the Knee Outcome Survey (KOS- ADLS) ; a minimum pain level of 3/10 on a visual analog scale (VAS) during running ; pain during 3 or more of the following: going up/down stairs, kneeling, squat- ting, resisted knee extension, and sitting for a prolon…	history of knee surgery ; patellar dislocation ; or symptoms after an acute trauma	all participants received gait training verbal instruction to increase step frequency, reduce noise when running and/or modify to midfoot/forefoot strike, asked to train more frequently but decrease daily distance, reduce speed, avoid downhill running, keep pain less than 2/10, and gradually increase distance, speed, and hills	all participants also performed impairment-based rehab 3 x wk (glute/quad strengthening, stretching, core muscle strengthening), and motor control performed daily (SL stance exercises)	intervention: 8 weeks, 8 sessions (1 per week). Examination: pre-post at 8 wks	KOS-ADLS ; VAS usual, worst, and running pain ; step freq, footstrike pattern, instantaneous VGRF, avg VGRF, max VGRF	16/21 were successes for tx. for "success" and overall participants, instantaneous and avg VGRFs decreased, and success subjects also trended toward more mid and forefoot strikes (p=0.072)
Influence of step length and landing pattern on patellofemoral joint kinetics during running	Willson et al	2015	repeated measures	6	auditory feedback: cadence ; verbal feedback: footstrike	metronome	20 healthy runners ; males and females	community runners	between 18 and 35 years old and ran at least twice per week for a minimum of 16 km/week.	current lower extremity injuries or pain with general activity that restricted participation in running or recreational activities for more than 1 day over the last 2 months ; Subjects with a history of surgery in either lower extremity within the last 12 months	preferred footstrike cadence conditions: 10% increase and 10% decrease from preferred step rate via metronome during treadmill running for 1 min each **rest period** alternate footstrike cadence conditions: 10% increase and 10% decrease in step length with alternate footstrike pattern	control preferred footstrike condition: treadmill running at preferred rate and footstrike for 2 mins. Alternate footstrike condition: treadmill running at preferred rate with alternate footstrike for 2 mins	intervention: single session Examination: baseline to immediate f/u	peak knee joint rxn and knee joint forces, cumulative knee joint rxn and knee joint forces, step length	10% dec stride length positively impacted knee joint rxn forces, impulses, and stresses compared to the 10% inc stride length
Influence of Step Rate and Quadriceps Load Distribution on Patellofemoral Cartilage Contact Pressures during Running	Lenhart et al	2015	randomized cross-over study	6	auditory feedback: cadence	metronome	22 healthy runners ; males and females	community runners	self-identified as recreational runners (at least 3 months of ≥ 24 km per week) ;	current pain during running ; lower extremity injury in the last 3 months ; previous lower extremity surgery	instrumented treadmill running at preferred speed, with randomized order of 10% dec step rate, regular step rate, and 10% inc step rate regulated by metronome (auditory feedback)	none	intervention: single session Examination: baseline to immediate f/u	3-D lower extremity modeling to determine: patellofemoral forces (net mean and peak loads, as well as contact area and location)	decreased patellofemoral joint stresses with an increased step rate compared to preferred and decreased step rates, and a small (.4 mm) lateral shift in patellar center of pressure w/ inc rate
The Effects of Forefoot Striking, Increasing Step Rate, and Forward Trunk Lean Running on Trunk and Lower Limb Kinematics and Comfort	dos Santos et al	2015	randomized cross-over study	6	verbal feedback (footstrike and trunk lean) ; auditory feedback (step rate)	metronome	31 healthy runners ; males and females	community runners	between 18–35 years of age ; RFS and ran a minimum of 20 km/wk at least 3 months	bone, joint or ligament injury in the prior 3 months, lower limb surgery, or pain in the lower limb or trunk while running	all subjects performed treadmill running at usual pace and style, then performed forefoot running (verbal), 10% increased step rate (auditory), and forward trunk lean (verbal) during running in random order. First session for familiarization, and second was for testing.	none	intervention: 2 sessions 3 days apart examination: single eval at second visit	ankle PF, knee flexion abd erot, hip flexion add irot, and trunk flexion at IC, avg, and peak	cadence condition: inc cadence, dec hip flex at IC, decreased avg knee flexion, pk dorsiflexion, knee flexion, knee abd, hip flexion, and adduction ; footstrike condition: decreased knee flexion and adduction, dorsi and knee flexion, increased PF and avg and peak knee erot ; trunk lean condition: decreased dorsi, pk knee abd, and avg and peak hip flexion, increased knee adduction and hip flexion,…
Patellofemoral Joint Stress during Running with Alterations in Foot Strike Pattern	Vannatta et al	2014	randomized cross-over study	5	verbal feedback: footstrike	pressure insoles	16 healthy rearfoot strike runners (1 dropout); female only	community runners	self-reported running routine of greater than 10 miles per week ; self-reported rearfoot strike pattern ; score of 5 or greater on the Tegner activity scale ; no reported knee symptoms similar to PFP, which limited regular participation in running in the past 12 months	pregnancy ; reported cardiovascular pathology ; surgery on either lower extremity in the last 12 months ; and traumatic injury to either knee in the past 6 months	feedback condition: 10 trials running and told ‘‘contact the ground on the ball of the foot.’’ across a 20 meter runway, confirmed by pressure sensor insoles to the researcher	control condition: 10 trials normal running footstrike pattern across a 20 meter runway	intervention: single session Examination: baseline to immediate f/u	peak knee joint stress, knee joint stress time interval, peak VGRF, peak quad force, avg hamstring force, avg gastroc force, avg soleus force, knee angle at IC, peak knee angle, total knee excursion, step length, "reach" (will not include reach)	decreased peak knee joint stresses by 27% in the GT condition compared to control, 12% for time interval, increased knee flexion, decreased knee excursion, more gastroc/soleus activity, however there were slightly higher GRFs in the forefoot running
Increasing Running Step Rate Reduces Patellofemoral Joint Forces	Lenhart et al	2014	randomized cross-over study	6	auditory feedback: cadence	metronome	30 healthy runners; males and females	community runners	recreational runners (running at least 24 km/week for 3 months, 44 ± 21 km/week) who were currently pain-free while running	previously undergone lower extremity surgery or sustained a leg injury in the past three months	instrumented treadmill running at preferred speed, with randomized order of 10% dec step rate, regular step rate, and 10% inc step rate regulated by metronome (auditory feedback)	none	intervention: single session Examination: baseline to immediate f/u	3-D lower extremity modeling to determine: kinematics and kinetics	increased step rate significantly decreased all kinetic muscle moment measures compared to preferred step rate and decreased step rate, except for the biceps femoris in which there was no difference compared to preferred rate. Decreased step rate increased LE kinetic measures compared to other conditions
Effects of step length on patellofemoral joint stress in female runners with and without patellofemoral pain	Willson et al	2014	randomized cross-over study	6	verbal feedback for step length during and after running trials	verbal during running ; screen-based after each trial	23 runners (10 healthy, 13 healthy) ; females only	community runners	(HEA) 18–35 years old, ran at least 10 miles per week and reported their activity level as greater than or equal to 5 out of 10 on the Tegner activity scale; (PFP) HEA + verbal pain score of at least a 3 (moderate) on a 10 point verbal pain scale during running and squatting, prolonged sitting, ascending or descending stairs, or jumping, pain behind or adjacent to the patella and not solely at th…	(HEA) pregnant, reported a known cardiovascular pathology, had surgery to either lower extremity over the last 12 months or sustained a traumatic injury to either knee joint within 6 months of the study were excluded (PFP) HEA + signs and symptoms of a meniscus or ligament injury, were currently receiving supervised treatment for PFP, or reported symptoms in either foot, ankle, hip or low back th…	(PFP) overground running at preferred step length, then randomized order of 10% increased and 10% decreased step length from preferred length via verbal instructions and feedback after each trial for 5 trials each	(HEA) overground running at preferred step length, then randomized order of 10% increased and 10% decreased step length from preferred length via verbal instructions and feedback after each trial for 5 trials each	intervention: single session Examination: baseline to immediate f/u	step length, stance time, peak knee flexion, peak knee extensor moment, peak knee joint stress, knee stress-time integral per step, per mile	on avg, the decreased step length condition produced decreased knee joint loads, moments, and flexion angles. Converseley, the increased step length condition increased knee loading, moments, and angles
Changes in Muscle Activation Patterns when Running Step Rate is Increased	Chumanov et al	2013	randomized cross-over study	6	auditory feedback: cadence	metronome	45 healthy runners ; males and females	community runners	ran a minimum of 24.1 km/wk (15 miles/wk; average volume, 29.8 ± 15.5 miles/wk) and had been running for at least 3 months prior to study enrollment	experienced a leg injury in the prior 3 months; had undergone hip, knee, or ankle joint surgery; or currently had pain in their back or lower extremities while running	instrumented treadmill running at preferred speed, with randomized order of regular step rate, 5% inc step rate, and 10% inc step rate regulated by metronome (auditory feedback)	none	intervention: single session Examination: baseline to immediate f/u	muscle activity during loading response (IC)	no significant findings were identified for either the 5% or 10% increased rates compared to preferred running rates for muscle activity at loading response
The outcome of a novel biomechanical therapy for patients suffering from anterior knee pain	Haim et al	2012	retrospective study	4	external device	instrumented shoes	48 AKP patients ; male and female	therapy center	anterior knee or retro-patellar pain for over 3 months diagnosed by a physician ; reproducible pain upon carrying out at least two of the following functional activities: stair ascent or descent, squatting, kneeling, prolonged sitting or isometric quadriceps contraction; tenderness on palpation of the patella, or pain with stepping down or double leg squatting	severe systemic diseases, lower extremity orthopedic surgery, infection, concomitant injury or pain from the hip, lumbar spine, or other knee structures ; previous knee surgery, and knee joint effusion	AposTherapy biomechanical shoe that shifts foot's COP during gait and convex surfaces that generate pertubations during gait	none	intervention: 26 weeks (start 10 minutes per day with 5 minute walk, and working up to 60 minutes per day with 30 minute walk). Examination: 13 and 26 wks	barefoot gait test on instrumented mat (velocity, step length, cadence, stride length, BOS, swing%, stance%, SL support%, DL support%), WOMAC pain	all parameters improved except BOS 13 wks: walking velocity inc. 5.7cm/s, cadence inc. 1.6 steps/min, stride length inc. 3.4 cm pain dec. 36.6% from baseline 26 wks: walking velocity inc. 8.6 cm/s, cadence inc. 2.5 steps/min, step length inc. 2.5 cm, stride length inc. 4.9 cm, swing inc .5 %, stance dec. .7%pain dec. 49.2% from baseline
Mirror gait retraining for the treatment of patellofemoral pain in female runners	Willy et al	2012	pre-post design	2	visual feedback (mirror) and verbal feedback: LE alignment	mirror	7 PFP runners ; females only (originally 10, but 3 dropped out)	community runners	between 18 and 40 years of age ; running at least 10 km/week ; comfortable with treadmill running at 3.35 m/sec ; free of any cardiac risk factors ; retropatellar or peripatellar pain that was insidious in nature and self-rated at least at a “3” (moderate) on a visual analog scale during running and at least one of the activities of jumping, squatting, kneeling, prolonged sitting, or stair descent	patellofemoral instability or other knee diagnoses, history of any lower extremity surgery, or who were otherwise unhealthy	all subjects performed treadmill running at initial visit and were played back the video after to highlight poor hip and knee alignment. During intervention visits, subjects did treadmill running in front of mirror (visual) and investigators instructed to "run with knee apart and knees pointing ahead, and squeeze buttocks". Running time inc. 15 to 30 mins over sessions, and feedback gradually rem…	none	intervention: 2 weeks, 8 sessions (4 per week). Examination: pre-post at 2 weeks, 1 mo, and 3 mo	pelvic drop, hip adduction, hip internal rotation, hip abduction moment, pain, LEFS	mirror gait training improved pelvic drop, hip adduction, thigh adduction, and hip abduction moment at 2 weeks. Hip adduction remained improved at 1 and 3 months, and hip abduction moment remained improved at 3 months. Pain and lower extremity function significantly improved at 2 wks and persisted at both f/u points
Effects of step rate manipulation on joint mechanics during running.	Heiderscheit et al	2011	randomized cross-over study	6	auditory feedback: cadence	metronome	45 healthy runners ; males and females	community runners	familiar with treadmill running; ran a minimum of 24.1 km/wk; and had been running for at least 3 months prior to study enrollment	leg injury in the prior 3 months; had undergone hip, knee, or ankle joint surgery; or currently had pain in their back or lower extremities while running.	instrumented treadmill running at preferred speed, with randomized order of regular step rate, 5% inc and dec step rate, and 10% inc and dec step rate regulated by metronome (auditory feedback)	none	intervention: 1 visit only examination: immediate effects	step length, stance time, vertical COM, foot inclination angle at IC, horizontal distance b/w COM and heel at IC, GRFs, RPEs, LE joint energy absorption and generation, and angles and moments at the hip and knee	w/ increased step rate (cadence) --> step length and and vertical COM displacement decreased with closer heel placement, and less overall energy absorption at the knee and force generation w/ 10% increase --> positive effects were seen w/ foot inclination angle, vGRF, and %stance, and had less hip absorption, more flexed knee at IC and less peak knee flexion over stance, and les peak hip flexion,…
The effect of real-time gait retraining on hip kinematics, pain and function in subjects with patellofemoral pain syndrome	Noehren et al	2010	pre-post design	4	visual and verbal feedback: hip adduction (visual) gluteal activation and knee alignment (verbal)	screen-based feedback	10 PFP runners ; males and females	community runners	ages of 18 and 45 years old ; report anterior knee pain during running that had persisted for at least 2 months and were unrelated to overt trauma ; running at least three times per week for a minimum total of 6 miles per week ;	any cardiovascular condition, any injury other than knee pain and any impairment that could influence their gait ; receiving any other concurrent treatment for the duration of the study	real-time visual feedback of hip adduction angle while running on a treadmill, and instructed to knee their hip within a 1 SD range of normal hip adduction, instructed to contract glutes, keep knee straight ahead, and maintain level pelvis ; run time increased 15 to 30 mins, visual feedback for 1st 4 sessions, and gradually removed over the next 4 sessions (faded feedback)	none	intervention: 2 weeks, 8 sessions (4 per week). Examination: pre-post at 2 weeks, and 1 month f/u	peak hip adduction, hip IR, pelvic drop, VAS pain, LEFI ; vertical loading rates at 2 weeks only	at 2 weeks, participants had reduced peak internal rotation by 2 degrees, and decreased loading rates (from 18 to 20%). At both time points, there was reduced peak hip adduction, contralateral hip drop, and improved pain/function outcomes
N=17

## Sheet: ACL
Title	Author	Date	Study Type	PEDro Score	Category	Devices	subjects (N)	recruitment setting	inclusion	exclusion	intervention/methods for primary GT outcomes	comparison groups	# of visits & length of intervention	comparative measures relevant to GT	main findings
Relationships Between Knee Extension Moments During Weighted and Unweighted Gait and Strength Measures That Predict Knee Moments After ACL Reconstruction	Hartigan et al	2017	descriptive laboratory study	6	increased loading (weighted vest ; weighted sled)	weighted vest ; weighted sled	38 ACLR adults ; males and females	university setting	growth plates were closed, ACLR had occurred in the past 5 to 12 months, they were discharged from physical therapy, and were cleared to return to sports	concomitant knee ligament injury during ACL rupture, known cardiac or neurologic pathology, surgery within 12 months excluding ACLR, knee pain with activity, current use of pain medication, or ACL revisions.	normal overground walking trials were collected first, and then randomized trials of sled and vest (both at 50% BW) walking trails were obtained	none	intervention: single session examination: baseline, during	males and females examined separately: knee extension moment impulse of ACLR, and symmetry index	the sled condition highlighted asymmetries between limbs in males and females
Assessment of Gait Symmetry Improvements in National Athletes after Anterior Cruciate Ligament Reconstruction during Rehabilitation	Hadizadeh et al	2016	repeated measures design	5	multimodal - offloading (aquatic walking), treadmill walking, running program, backwards walking	underwater treadmill ; treadmill	37 participants (8 ACLR, 15 control) ; males and females	(ACLR) national athletics rehab center (HEA) national athletics	(ACLR) active national athletes prior to their injury and had undergone a hamstring graft no later than three months post-injury ; (HEA) healthy national sport-matched athletes	(ACLR) previous knee injury to current injury to either limb, and were free of other ligamentous injury ; (HEA) history of lower limb injury or surgery	ACLR: 5-phase rehabilitation protocol to restore the normal gait pattern as well as the range of motion (ROM), muscle strengthening and stretching, balance training, and aerobic conditioning exercises, and included modal- ities such as cryotherapy, and running program. Walking consisted of offloading via aqua therapy, treadmill walking, and then a jogging program	HEA: no intervention, maintained current trianing status	intervention: 12 weeks, 5 phases examination: 3-4wks, 7-8wks, and 11-12 wks timepoints (12 weeks post-surgical)	walking step length, cadence, gait velocity, stance time, weight acceptance time, step length symmetry, cadence symmetry, stance time symmetry, weight acceptance symmetry	except for stance time, step length, cadence, weight acceptance, and mean velocity all significantly improved. Spatiotemporal parameters were not significantly different from healthy control subjects at 12 weeks, indicative of improvement. Limb symmetry also significantly improved from initial visit to 12 weeks
Gait analysis of national athletes after anterior cruciate ligament reconstruction following three stages of rehabilitation program: Symmetrical perspective.	Hadizadeh et al	2016	repeated measures design	5	multimodal - offloading (aquatic walking), treadmill walking, running program, backwards walking	underwater treadmill ; treadmill	37 participants (22 ACLR, 15 control) ; males and females (SAME PARTICIPANTS)	(ACLR) national athletics rehab center (HEA) national athletics	(ACLR) active national athletes prior to their injury and had undergone a hamstring graft no later than three months post-injury ; (HEA) healthy national sport-matched athletes	(ACLR) previous knee injury to current injury to either limb, and were free of other ligamentous injury ; (HEA) history of lower limb injury or surgery	ACLR: 5-phase rehabilitation protocol to restore the normal gait pattern as well as the range of motion (ROM), muscle strengthening and stretching, balance training, and aerobic conditioning exercises, and included modal- ities such as cryotherapy, and running program. Walking consisted of offloading via aqua therapy, treadmill walking, and then a jogging program	HEA: no intervention, maintained current trianing status	intervention: 12 weeks, 5 phases examination: 3-4wks, 7-8wks, and 11-12 wks timepoints (12 weeks post-surgical)	walking gait velocity, stance knee angular ROM, swing knee angular ROM, SL knee angular ROM, VGRF, symmetry indeces of all knee angular components and VGRF, and knee extension moment (VELO will not be used here since this is a repeat measure)	significantly improved (increased) knee stance ROM from 8 and 12 weeks compared to baseline, and from 12 weeks to baseline for SLS knee ROM, and no differences were evident b/w ACLR and control at 12 wks. Symmetry indeces improved for knee ROM from 8 and 12 weeks to baseline and were similar to controls. VGRF, VGRF symmetry, and knee ext moment significantly improved and was similar to controls a…
Muscle Activity During Running With Different Body- Weight-Support Mechanisms: Aquatic Environment Versus Body-Weight-Support Treadmill	Mercer et al	2014	cross-over study	5	offloading (underwater treadmill and LBPP treadmill)	underwater treadmill ; lower body positive pressure treadmill	8 healthy adults	did not specify	healthy adults who did not have any injury that interfered with their ability to run in the water/on a treadmill	inability to run in water or on treadmill	preferred speed was determined first to maintain the desired tempo for testing, then wore electrogoniometer and EMG underwater: participants performed high-knee and cross-country style running in each condition ; LBPP: participants ran at 60% and 80% bodyweight	none	intervention: single session, 20-60 seconds collected for each testing position once at preferred speed examination: during testing procedures	rectus femoris, tibialis anterior, medial gastroc, and biceps femoris muscle activity (%MVIC)	the rectus femoris and biceps femoris were less active during high-knee running compared to cross country underwater running ; bicpes femoris activity was greater in high knee running than altered bodyweight conditions. Muscle activity timing differed between groups throughout the gait cycle
Evaluation of gait kinematics and symmetry during the first two stages of physiotherapy after anterior cruciate ligament reconstruction.	Winiarski et al	2012	repeated measures design	5	multimodal - verbal treadmill walking instructions, treadmill inclination walking	treadmill	97 participants (53 ALCR, 44 control) ; all males	(ACLR) physical therapy (HEA) not specified	(ACLR) patients with completely torn ACLs due to participating in amateur sports who had undergone endoscopic ACL recon- struction using grafts of the semitendinosus and gracilis muscles and Rigidfix stabilisation under an identifcal PT program (HEA) physically active, employed individuals	(HEA) history of musculoskeletal pathology	ACLR: 2 phases of rehab, phase 1 from wk1-5 post-surgical with strengthening/ROM exercises, cryotherapy, and instructions during gait for restoration with GRFs monitored. Wk6-12 more ROM and strengthening, cardio, and training gait patterns on treadmill and changing inclination.	HEA: no intervention	intervention: 12 weeks, 2 phases examination: 2-3wks, 6-8wks, and 10-12 wks (12 weeks post-surgical)	step length, step length symmetry, %stance, % stance symmetry, %double stance, % double stance symmetry, gait velocity, cadence, knee ROM at IC, peak knee ext at stance, knee ROM	compared to wk3, all parameters significantly differed (improved) at 6-8wks and 10-12wks. Additionally, most values at 10-12 weeks were comparable to the control group
Efficacy of Gait Training With Real-Time Biofeedback in Correcting Knee Hyperextension Patterns in Young Women	Teran-Yengle et al	2011	repeated measures design	3	visual feedback (knee kinematics on screen) and verbal instruction (bend knee, keep within target line)	screen-based feedback	10 females w/ knee hyperextension	university setting	asymptomatic knee hyperextension greater than 5° during passive range of motion	history of lower limb surgery or cardiovascular, functional, or visual limitations	subject first oriented to the system, and then performed treadmill walking training 2 times per week for 3 weeks with visual real-time feedback for knee sagittal plane kinematics with a bar at 5 degrees knee flexion and verbal feedback to bend the knee, keep joint angle within the target line, and maintain normal gait. 3x 6-minute feedback with 3 min rest periods in between for 1 hr	none	intervention: 6 sessions (2 sessions per week for 3 weeks), 18 minutes of feedback per session examination: baseline to follow-up and 1 month post	peak knee extension	there was a significant reduction in knee hyperextension from pre-training to post-training, and from pre-training to 1-month f/u. There was, however, and increase in knee extension from post-training to 1 month f/u
Gait and neuromuscular adaptations after using a feedback-based gait monitoring knee brace	Riskowski et al	2010	repeated measures design	4	external device (knee brace for tactile, and auditory feedback for knee kinematics and vertical acceleration)	instrumented knee brace	15 healthy females	university setting	healthy females, ages 18-30	inability to follow instructions, unstable heart conditions, joint replacements in the lower extremities, arthritis, diabetes, vestibular deficits, inability to hear the feedback signal (dB = 45) or any type of neuromuscular problems that could prevent subjects from meeting the project requirements of a healthy individual	participants performed overground walking trials with no brace on. Next subjects wore a knee brace, side based on random allocation, and performed 30 minutes of overground walking with auditory feedback if there was limited knee flexion, or high vertical acceleration (subjects did not know this, just told to limit the amount of signal), then immediately tested with brace on, and tested after an h…	none	intervention: single session, 30 minutes examination: baseline, immediate f/u, and 1 hr post	knee angle at IC, knee angle just before IC, vertical acceleration at iC, pk knee extensor moment, pk knee flexor moment, pk knee abductor moment, rate of loading, gait velocity, duration of gait cycle, % stance, % swing, stride length, step length symmetry	participants decreased loading and increased knee flexion, and peak extensor, flexor, and abductor knee moments
A Kinematic Comparison of Deep Water Running and Overground Running in Endurance Runners	Kilding et al	2007	cross-over study	5	offloading (underwater running)	training pool ; metronome	5 healthy male runners	community runners	experienced, non-injured male endurance-trained runners ; performed regular periodized training under coaches in regional running team ; familiar with deep water running	see inclusion	fast and slow running paces were maintained with a metronome, and were performed in overground and underwater conditions	none	intervention: single sessions examination: immediate	hip flexion, extension, ROM ; knee flexion, extension, and ROM	underwater running manifested in lesser knee extension, less hip flexion and increased hip extension
Kinematic assessment of treadmill running using different body-weight support harnesses	Millslagle et al	2006	randomized cross-over study	6	offloading (3 different styles of harnesses)	harness for decreased BW running	10 collegiate male runners	university setting	healthy male runners from the varsity cross country team (D1)	cardiovascular risk factors that would impact submaximal running (screening with Moderate Exercise Health Screening Report)	participants performed 2 training sessions to get accustomed to the harnesses, then were collected while walking normally on a treadmill at a set speed with full body weight, 20% bodyweight, and 40% bodyweight conditions	none	intervention: 3 sessions - 2 familiarization, 1 collection examination: during each condition	cycle length and frequency, contact time, torso rotation, hip ROM, knee ROM, ankle ROM, COM vertical displacement
Lower Body Positive-pressure Exercise after Knee Surgery	Eastlack et al	2005	repeated measures design	6	offloading (LBPP treadmill)	lower body positive pressure treadmill	6 ACLR adults ; males and females	post-surgical setting	(ACL) reconstruction with autograft or allograft patellar tendon, and exercised under LBPP conditions before surgery and once a week for 6 weeks postoperatively. The same surgeon did all of the surgeries	pulmonary or cardiac disease, took beta-blocker medications, were pregnant, or were younger than 18 years	after warming up on the treadmill, participants walked in randomized order at 100%, 60%, and 20% of bodyweight at preselected speed	none	intervention: 6 weeks of LBPP treadmill walking, 6 sessions examination: pre-op, and weekly up until 6 weeks for knee ROM. At week 1, GRFs were obtained	peak ground reaction force, knee range of motion, VAS for pain	approximately 70% reduction in GRFs at 20% body weight ; achieved approximately 21 degrees of knee ROM at week 1 under 20% BW ; and at weeks 3 and 4, both offloading conditions facilitated more knee ROM than full weight bearing, but comparable at 6 weeks. offloading significantly reduced VAS scores for knee pain
Gait retraining after anterior cruciate ligament reconstruction.	Decker et al	2004	randomized control trial, repeated measures	6	auditory feedback (metronome) for stride frequency	metronome	24 participants (16 ACLR, 8 healthy controls)	(ACLR) medical center (HEA) community	reconstruction by the same orthopedic surgeon, participated in an accelerated rehabilitation strength and ROM protocol, and were restricted from recreational and sporting activities for the first 12 weeks after surgery, and able to bear weight	knee flexion contractures that prevented full knee extension; chronic knee joint effusion; and concomitant injuries that prevented, or delayed, early weight bearing (chondral defects, meniscal tears, multiple ligamentous ruptures)	Group 1: walking at a pre-specified pace cued by a metronome while walking to control stride frequency for 20-30 minute bouts	Group 2: ACLR preferred stride rate for 20-30 mins ; Control Group: no intervention, used as a gait comparison	intervation: 6 weeks, at least 3 days per week examination: pre-post at 6 weeks (12 weeks postsurgical)	LE ROM, contact joint positions, avg joint positions, hip and knee extensor impulses, work and power	GT group had increased stride length and frequency compared to the control group, improved in knee position, weight acceptance, and midstance knee ROM (65%, 40%, and 96%), decreased hip extensor impulse and increased knee extensor impulse (23%, 55%), and increased knee extensor work (113% and 110%) compared to baseline. most measures in both groups were different compared to healthy subjects. No …
Lower limb joint moment during walking in water.	Miyoshi et al	2003	cross-over study	5	offloading (underwater walking)	training pool	8 healthy males	did not specify	healthy males	past history of orthopedic or neurological ailments, or any recent injury or surgery that might affect his walking and upright standing pattern	participants walked at a preferred pace overgound and underwater at 20% bodyweight ten times for each condition	none	intervention: single session examination: pre-post	hip knee and ankle joint moments and joint range of motion during early middle and late stance	there was 8 degrees of flexion offset for the hip ; peak dorsiflexion shifted from late to mid-stance in water ; knee range of motion signficantly decreased in mid and late stance in water ; increased hip extension moment, mainly flexion moment at the knee, and reduced ankle moments
Electromyographic and Kinematic Analysis of Graded Treadmill Walking and the implications for Knee Rehabilitation	Lange et al	1996	repeated measures design	6	inclination (graded treadmill)	woodway treadmill with graded incline	6 healthy males	did not specify	healthy males	no prior history of patellofemoral problems or other knee pathologies	participants' self-selected walking pace was determined, and then treadmill walking trials were performed at 0, 12%, and 24% grade on a treadmill	none	intervention: single session examination: pre-post	VMO, vastus lateralis, biceps femoris, medial hamstrings average and absolute peak EMG amplitudes ; ankle, knee, and hip maximum and minimum degrees ROM	all muscle EMG activity, and the majority of lower extremity joint angles singificantly differed at the inclination grades, especially with the 24% incline
N=13

## Sheet: ERLLP
Title	Author	Date	Study Type	PEDro Score	Category	screen-based feedback	subjects (N)	recruitment setting	inclusion	exclusion	intervention/methods for primary GT outcomes	comparison groups	# of visits & length of intervention	comparative measures relevant to GT	main findings
Primary and secondary effects of real-time feedback to reduce vertical loading rate during running	Baggaley et al	2017	randomized cross-over trial	6	visual feedback (step length, footstrike, and loading)	screen-based feedback	32 healthy rearfoot strikers (males and females)	community runners	healthy individuals between the ages of 18 and 35 who were regularly running >16 km/week ; habitual rearfoot strikers	currently injured ; uncomfortable with treadmill running (less than 8 out of 10 on comfort)	baseline self-selected treadmill running kinematics/kinetics ; visual feedback for forefoot strike ; visual feedback for decreased step length ; visual feedback for vertical loading rate. Visual feedback was given as a target range to ramin inside based on the intervention type	none	intervention: randomized ourder, at least 30 seconds acclimation to condition and 15 second collection (single session) examination: pre- and immediate post	AVLR, step length, footstrike angle, eccentric knee joint work, concentric knee joint work, eccentric ankle joint work, concentric ankle joint work	all interventions decreased loading ; FFS reduced step length and shifted work to the ankle ; step length reduced ecc and con knee joint work ; low impact shifted work to the ankle ;
Kinetic changes during a six-week minimal footwear and gait-retraining intervention in runners	Warne et al	2017	randomized control trial	5	multimodal: footwear, and verbal (instructions for multiple running adaptations)	verbal FB only	24 trained male runners	local athletic clubs	males running 5–7 days per week for a minimum of 40 km ∙ week ; regularly competing at 5 km to marathon distances ; club level of participation	any lower limb injuries in the last three months ; previous barefoot or minimalist running experience	Combined intervention group: warmup on treadmill, then running analysis overground in minimalist and conventional footwear ; injury prevention exercises + gait retraining to increase stride frequency by 10%, FFS, maintain upright posture, and land softer. Completed with minimalist shoes during training sessions, and encouraged to maintain GT during regular runs in regular shoes too	Control intervention group: warmup on treadmill, then running overground in normal footwear ; injury prevention exercises + gait training with normal footwear	intervention: 6 week protocol 3 days per week (18 total sessions) examination: pre-post (6 weeks)	loading rate, peak impact, vertical stiffness, knee stiffness, ankle stiffness	33% reduction in loading rates in the combined intervention group, and an 18% reduction in the control intervention group, a reduction in ankle stiffness by 12% in both groups, and an overall 21% lower knee stiffness in the combined intervention group throughout testing. aditionally, there was a higher tendency to adopt a non-rearfoot strike pattern in both groups
The effect of three surface conditions, speed and running experience on vertical acceleration of the tibia during running	Boey et al	2017	cross-over study	5	speed and surface (impact data based on accelerometer)	accelerometer	35 participants (12 untrained runners, 12 recreational runners, 11 trained runners) ; males and females	did not specify	untrained: no running experience, less than 2 hrs of sport per week ; recreational: b/w 10-30 lm per week for at least 6 mos ; trained: more than 50 km per wk under coach supervision for at least 2 years	any injury at the time of testing or within 3 months prior to testing	all participants warmed up (running for runners, walking for untrained) ; then performed running on a concrete, synthetic running track, and woodchip trail at self-selected and fixed running speeds while wearing an accelerometer on the right distal tibia	same for all groups	intervention: single session examination: pre- and immediate post	peak vertical accelerations	peak vertical accelerations were higher at self-selected speeds (higher at higher speeds) ; there were slightly lower peak vertical accelerations on the woodchip surface compared to the track and concrete conditions
Sound-Intensity Feedback During Running Reduces Loading Rates and Impact Peak	Tate et al	2017	pre-post assessment	5	loading (auditory feedback)	custom application for decibel-based loading	14 healthy runners ; males and females	PT clinic	currently running at least 9.7 km/wk ; running at least 30 minutes continuously at least once per week ; familiar with treadmill running	hearing problems ; current lower extrmity injury	participants ran overground at self-selected speed, then performed treadmill-based gait retraining with auditory feedback to decrease loading (decibel was related to loading), and instructed to run softer	none	intervention: single session gait training examination: pre- and immediate post	tibial peak vertical impact, IVLR, AVLR	there were statistically significant reductions in all loading variables following auditory loading feedback
Immediate effects of modified landing pattern on a probabilistic tibial stress fracture model in runners	Chen et al	2016	pre-post assessment	5	visual and verbal (footstrike pattern) auditory to maintain cadence	metronome ; screen-based feedback	14 healthy heelstrike runners (males and females)	community runners	experienced shod runners ; free from any injury for at least six months prior to the experiment ;	any injury within 6 months of the experiement	preferred cadence was maintained via metronome, and verbally instructed to adopt midfoot strikes and then forefoot strikes	none	intervention: single session gait training (~10 mins) examination: pre- and immediate post	AVLR, IVLR, anterior, longitudinal, and mediolateral ankle joint rxn forces, peak tibial strain, and risk of tibial stress fracture based on MSK modeling	both FFS and MFS reduced the instantaneous and average vertical loading rates ; FFS increased longitudinal ankle loading rates ; no differences between footstrike and risk of tibial stress fracture
In-field gait retraining and mobile monitoring to address running biomechanics associated with tibial stress fracture	Willy et al	2016	randomized control trial	8	cadence (based on info from accelerometer on watch)	accelerometry feedback	30 runners ; males and females	dual-site collegiate runners	running at least 11.3 km/week, 18–35 years of age, and injury free for the past 90 days ; IVLR qualification criterion of ≥85 body weights(bw)/second in either limb	innjury within the past 90 days, or low impact runners	intervention group: baseline running on treadmill at self-selected cadence, then instructed to increase cadence by 7.5% during 8 normal runs as determined by an accelerometer and paired wristwatch using a faded feedback design	control group: continue normal running routine	intervention: 8 runs, full feedback sessions 1-3, 5, and 7, no feedback for sessions 4, 6, and 8 (faded design) examination: post-training, and 1 mo f/u	cadence, IVLR, AVLR, peak hip add, eccentric knee joint work per stance and per km	the gait retraining group inc. step rate by 8.6%, and decreased loading, hip abduction (2.9deg), and eccentric knee joint work per step (26.9%) and per km (21.2%)
Retraining running gait to reduce tibial loads with clinician or accelerometry guided feedback	Creaby et al	2016	randomized, repeated measures design	6	loading (verbal cures from clinician vs. accelerometer based-feedback)	accelerometry feedback	22 healthy male runners	community runners	aged 18–45 years; run greater than 10 km per week for the past 12 months	any current injuries; any current or past disease, condition or surgery which may affect running or walking patterns.	accelerometry group: participants warmed up on a treadmill, then were provided real-time feedback regarding their tibial accelerometry from accelerometer mounted on distal tibia displayed on screen	verbal group: participants warmed up on treadmill, and were given clinician feedback to "run softer" or "make footfalls quieter"	intervention: single session of feedback lasting for approximately 10 minutes examination: baseline, during feedback, post-feedback, and week f/u	tibial peak positive acceleration	during feedback: (C) 23.9% (A) 28.5% post-feedback: (C) 28.1% (A) 18.9% 1 week f/u: (C) 22% (A) 21.2%
The effect of a cadence retraining protocol on running biomechanics and efficiency: a pilot study.	Hafer et al	2015	pre-post assessment	3	cadence (preferred audible tool)	metronomes or music playlists with matched pace or other phone/computer applications were given as options for cadence	5 healthy runners ; males and females (originally 6, but 1 did not f/u)	recreational runners	recreational rearfoot strike runners training an average of 18.5 miles/week (s = 5.16)	running-related injuries	participants completed a baseline visit running exam, then completed at least 50% of weekly mileage with +10% increased cadence via preferred audible tool for 6 weeks, then completed follow-up exam	none	intervention: 6 week protocol with 50% mileage with feedback examination: baseline to 6 weeks f/u	VO2, center of mass vertical displacement, heel strike distance, stride length, knee flexion at IC, ankle dorsiflexion at IC, peak hip adduction angle, peak hip abductor moment, peak hip extensor moment, peak knee extensor moment, peak plantarflexion moment, vertical loading rate	at initial visit, the 10% running condition changed COM vertical displacement, stride length, dorsiflexion at IC, hip adduction, abductor moment, knee extensor moment, and plantarflexor moment ; after 6 weeks, preferred cadence increased with decreased dorsiflexion at IC, peak adduction and vertical loading, and similar changes with 10% increased cadence
Gait Retraining and Incidence of Medial Tibial Stress Syndrome in Army Recruits	Sharma et al	2014	randomized control trial	6	visual and verbal feedback (plantar pressure, loading, foot positioning)	plantar pressure mat	166 (83 allocated to control and intervention, 14 total drop outs intervention, 18 dropouts contol)	military	all new Line Regiment Brisitsh infantry recruits ; "at risk’’ of medial tibial stress syndrome --> (obvious abnormal deviation from the ideal gait pattern such as signs of hip drop, line of progression, foot angle with respect to direction of travel and hip and tibial rotation, and any abnormal foot pronation, as well as supination during treadmill walking, and average foot balance during the fir…	existing or prior lower limb injury affecting gait pattern in the previous 3 wk, had any neurological dysfunction, were users of orthotics, or declined to participate/withdrew consent	intervention: overground walking with visual and verbal biofeedback for plantar pressure, foot positioning at initial contact, and loading were provided to participants in the intervention grou for gait training. (~30 mins once a week for 12 weeks, and every other week for 12 weeks after that) Also performed rehab for strength, flexibility, and NM control targeting foot, leg, and LPHC) 10 exercis…	control: usual military training regimen	intervention: 24 weeks, total of 18 gait training session, 72 rehab sessions examination: 26 weeks after initial visit (single follow-up eval)	incidence of MTSS, foot balance, and time to reach peak heel rotation	gait retraining reduced instantaneous relative risk of MTSS development, with a low NNT (14)
Influence of Tibial Shock Feedback Training on Impact Loading and Running Economy	Clansey et al	2014	randomized control trial	4	multimodal ; auditory and visual based on peak tibial acceleration (via accelerometer)	accelerometer	29 originally allocated, 22 RFS male runners completed	recreational runners	typically running at least 30 km/wk ; free from injury 6 months before testing ; elicited average PTA value greater than 9g during six overground running trials at 3.7 m/s (±5%) over a 15-m runway	history of any major musculoskeletal gait modifying injuries (such as an anterior cruciate ligament tear) or cardiovascular pathology	intervention group: pre/post overground running assessment ; treadmill gait training for approx. 35 mins for 6 sessions over 3 weeks, visual and auditory feedback of peak tibial acceleration 5-stride moving average detected via accelerometer	control: pre/post overground running assessment ; treadmill running sessions without feedback	intervention: 6 training sessions of 3 weeks, approximately 30 mins each examination: pre-post 3 wks, and 1 mo f/u	peak tibial acceleration, average loading rate, instantaenous loading rate, peak vertical impact, hip angle, knee angle, ankle angle, footstrike angle, heel vertical velocity, running economy	the gait retraining group decreased peak tibial acceleration at both time points, decreased average and instantaneous vertical loading rates at 3wks, a more PF ankle position and midfoot strike pattern at 1 month, and reduced heel vertical velocity at 1 month. these results were also significantly different from the control group as those parameters remained relatively constant
A 4-week instructed minimalist running transition and gait-retraining changes plantar pressure and force	Warne et al	2014	randomized cross-over trial	5	multimodal: footwear, and verbal (instructions for multiple running adaptations)	verbal FB only	10 female runners	local athletic clubs and collegiate teams	female trained runners running 3-5 days per week ; previous experience with treadmill running	any lower limb injuries in the last 3 months, had previous barefoot or minimalist running experience or currently used orthotics.	warmup on treadmill, then running analysis on treadmill in minimalist and conventional footwear ; injury prevention exercises + gait retraining to increase cadence and shorten stride, FFS, maintain upright posture, and to run light and quiet. Completed with minimalist shoes during training sessions, and encouraged to maintain GT during regular runs in regular shoes too	none	intervention: 4 weeks with running performed 3 days per week examination: baseline to 4 weeks f/u	footstrike patterns, stride frequency, mean maximum foot force, and mean maximum foot pressure	in conventional running shoes: both the mean max force and pressure decreased from baseline to follow-up. Only one subject changed to a forefoot strike, and cadence increased
Effects of changing speed on knee and ankle joint load during walking and running	de David et al	2014	cross-over study	4	speed	verbal instruction and pressure mat	11 male rearfoot strike runners	recreational runners	training regularly ; rearfoot strikers ; recreational experience with running (at least three times per week) in the last six months before the experiments	history of lower extremity injuries	overground walking and running at different speeds: self-selected walking speed, maximum fast walking speed, 30% slower running, running at 4m/s ; 5 successful trials at each speed	none	intervention: single session examination: pre- and immediate post	peak moments for: ankle PF inv abd, knee flex ext abd and erot	knee extenstion and abduction moments, and ankle plantarflexion all increased with increased speed, knee flexion moments decreased from walking to running, and EROT changed between conditions **contacting authors for data**
Forefoot Running Improves Pain and Disability Associated With Chronic Exertional Compartment Syndrome	Diebal et al	2012	case series	4	verbal and auditory feedback for footstrike and cadence respectively (metronome)	metronome	10 army chronic exertional compartment syndrome patients (male and female)	army community hospital	symptom onset within the first 10 to 30 minutes of exercise and symptom resolution or degradation within several minutes after exercise cessation ; military members required to pass the biannual Army Physical Fitness Test ; minimum of a 6-month history of recurrent anterior and/or lateral leg pain and tightness in one or both legs that worsened with running ; all symptoms had to completely resolv…	previous fasciotomy or other lower extremity surgery, any medical condition that could cause lower extremity swelling, creatine supplementation in the past 2 months, any injury that would affect running tolerance besides CECS, any respiratory issue that could effect running tolerance, and current use of nonsteroidal antiinflammatory drugs (NSAIDs) ; abnormal finding on any imaging modality (ie, r…	pre/post kinematics/kinetics during treadmill running at self-selected pace and anterior compartmental pressures pre-post runs ; intervention: verbal instructions to adopt forefoot strike, and metronome for 180 steps/min, and use posterior muscles, and training drills to reinforce footstrike pattern, and told to "run quietly"	none	intervention: 6 weeks, performed 3x wk for 45 mins (apprx. 30 mins of running training specifically) examination: pre-post follow-up at 6 weeks, 1 year f/u	Lower leg outcome survey (LLOS), single assessment numeric evaluation (SANE), RPE, VAS, compartmental pressures, step length, step rate, support time, VGRF, impulse, weight acceptance rate	although the RPE increased, participants presented with decreased pain, increased mileage, decreased intracompartmental pressure following running, inc step rate, dec step length, dec support time, dec vGRF, impulse, and wt acceptance rate, as well as improved self-reported function ** note: 2 subjects had unrelated injuries (ACL sprain and ankle sprain)
Step Frequency and Lower Extremity Loading During Running	Hobara et al	2012	randomized cross-over trial	6	auditory feedback (cadence)	metronome	10 healthy males	recreational runners	healthy recreationally trained, moderately active males not currently engaged in systematic running training	neuromuscular disorders or functional limitations in their lower extremity	all subejcts ran at their preferred cadence on treadmill, then performed -15%, -30%, and +15%, +30% cadence conditions in random order controlled via metronome	none	intervention: single session gait training examination: pre- and immediate post	peak vertical impact, and average and instantaneous loading rates	increasing step frequency significantly decreased all loading parameters compared to preferred step rate, and compared to decreased cadence conditions
Gait Retraining to Reduce Lower Extremity Loading in Runners	Crowell et al	2011	pre-post assessment	5	loading (accelerometer-based feedback)	accelerometry feedback	10 runners (males and females)	university athletes and recreational runners	rearfoot strikers ; running at least 16 km per week ; testing confirming that their tibial acceleration was above normal when they ran (above 8 g)	injuries or other conditions that would affect their gait	participants were collected at an initial visit while running on a treadmill with an accelerometer on the tibia, then over 8 gait training sessions provided feedback for peak positive acceleration on a monitor and instructed to stay within a range ; feedback time increased 15 to 30 mins, and faded in the last 4 sessions	none	intervention: 8 sessions over 2 weeks examination: baseline, 8 wks, 1 month	tibial peak positive acceleration, IVLR, AVLR, and peak vertical impact	decreased all loading parameters from baseline to post-training by between 20 to 48%, and these differences maintained at 1 month f/u
A Description of Shock Attenuation for Children Running	Mercer et al	2010	prospective cohort study	5	speed on treadmill (based on accelerometry)	accelerometer	18 adolescents (males and females)	did not specify	demonstrate comfortable gait patterns on the treadmill while not holding onto the rails	could not perform treadmill walking	all subjects warmed up on a treadmill with accelerometers on the right distal tibia and one in a headband. Subjects ran at self-selected speed, then 0.5 m/s faster than preferred speed, and then a 0.5 m/s slower than preferred speed, and an overground running trial at preferred speed	none	intervention: single session examination: pre- and immediate post	shock attenuation, leg peak acceleration, stride length	females had greater peak tibial accelerations and used shorter stride lengths than males. Within groups, there was increased shock attenuation at faster speeds, but greater tibial accelerations. Stride lengths and tibial accelerations decreased with slower speed. tibial accelerations were higher in the overground condition
Lower Limb Joint Kinetics During Moderately Sloped Running	Telhan et al	2010	randomized cross-over trial	6	incline treadmill running	treadmill	19 healthy runners/joggers ; males and females	community runners	healthy regular runners who ran or jogged at least 20 miles (32.19 km) weekly	chronic musculoskeletal conditions ; running-related injuries within 6 months of testing	all participants warmed up running on a treadmill at pre-selected speed at no incline, and then randomly ran with 4 degree incline and 4 degree decline slopes	none	intervention: single session examination: pre- and immediate post	peak moments for: ankle dorsi everson IROT, knee flexion varus IROT, and hip flexion adduction EROT ; LE power (generation and absorption) for: ankle, hip, knee ; GRFs (ML,AP,V)	neither incline nor decline had a significant impact on lower extremity joint moments, power, or most of the GRFs. The vertical GRF increased slightly with decline running
Reducing Impact Loading During Running With the Use of Real-Time Visual Feedback	Crowell et al	2010	pre-post assessment	4	loading (accelerometer-based feedback)	accelerometry feedback	5 female runners	recreational runners	running a minimum of 32 km per week for at least 3 months ; experienced running on a treadmill	any injuries or conditions that might have influenced their running mechanics at the time of the study	participants warmed up on an instrumented treadmill while wearing an accelerometer on the distal tibia, then given visual feedback of tibial acceleration with a goal line of 50% of mean tibial acceleration	none	intervention: single session of feedback lasting for approximately 10 minutes examination: pre-post design	tibial peak positive acceleration, peak vertical impact, IVLR, AVLR	**individual scores listed only --> contacting for means**
Effects of running speed on a probabilistic stress fracture model	Edwards et al	2010	cross-over study	6	speed	overgound running	10 male runners	recreational runners	participation in running, or athletic activity requiring running, on a weekly basis ; free from lower-extremity injuries resulting in the disruption of normal physical activity for at least 3 months before study participation	any injury within 3 months of the study	participants ran overground at 3 speeds (2.5m/s, 3.5 m/s, 4.5 m/s) in randomized order over forceplates and using a camera system for 10 trials at each speed	none	intervention: single session examination: pre- and immediate post	A-P, axial, and M-L tibial contact forces, peak principal strain, loading exposure, and probability of failure based on computer modeling	the distal tibial contact force generally increased with running speed, with axial being the dominant force, however loading exposure decreased with increased running speed due to the increased stride length
N=19

## Sheet: CAI
Title	Author	Date	Study Type	PEDro Score	Category	Devices	subjects (N)	recruitment setting	inclusion	exclusion	intervention/methods for primary GT outcomes	comparison groups	# of visits & length of intervention	comparative measures relevant to GT	main findings
Effects of an auditory biofeedback device on plantar pressure in patients with chronic ankle instability	Donovan et al	2016	descriptive laboratory study	4	loading (auditory feedback)	plantar pressure insole with force sensor and piezobuzzer for feedback	10 adults with CAI ; males and females	University/ surrounding community	history of more than one ankle sprain with the initial sprain occurring greater than 1 year ago, no sprain within the past 6 weeks and current self-reported functional deficits due to ankle symptoms that was qualified by a score of <85% on the FAAM Sport scale and a ≥11 on the Identification of Functional Instability scale (IdFAI).; physically active (at least 20 min of exercise a day at least 3 …	other known lower extremity injuries or pathologies	participants walked at self-selected pace first without feedback, then were oriented to the feedback, and once they were able to minimize the noise, they were collected again	none	intervention: single session examination: baseline, during feedback	peak pressure, pressure time integral, time to peak pressure, contact area, contact time, and EMG of the anterior tibialis, peroneus longus, medial gastroc, and glute med	feedback significantly reduced lateral midfoot, and lateral and central forefoot pressure and pressure time integral, with less contact area in the lateral midfoot and toes. However, the pressure increased in the hallux, and there was an increase in the pressure-time integral for the full foot. Peak pressure occurred sooner in the lateral midfoot. post-IC EMG amlitude increased for the peroneus l…
Lower limb joint stiffness and muscle co-contraction adaptations to instability footwear during locomotion	Apps et al	2016	repeated measures design	6	external devices (specialized shoes for perturbations)	rocker predictable instability shoe ; custom irregular midsole unpredictable instability shoe	18 healty females	community runners	heel-toe runners, wear shoe size UK 5.5 ± 0.5 and have no previous experience with US ; recreational exercise (5.5 ± 2.5 h/week)	any self-reported injuries	participants warmed up and walked and ran in control shoes, and then walked and ran in unstable shoes with predictable instability, and shoes with an unstable midsole with unpredictable instability in random order. All trials performed overground	none	intervention: single session examination: during each condition	ankle and knee joint range of motion, joint moments, joint stiffness, and medial gastroc and tib anterior activation and coactivation during walking and running in each condition	ankle joint stiffness decreased while knee joint stiffness increased at loading while walking and running in unstable shoes, and was opposite during propulsion ; muscle coactivation was highest in the unpredictable instability shoe for walking and running
Feedback and Feedforward Control During Walking in Individuals With Chronic Ankle Instability	Yen et al	2016	pre-post design	5	external devices (sandbags under the metatarsals for perturbations)	sandbags under the metatarsals	24 subjects (12 CAI ,12 HEA) ; males and females	university setting	CAI: 24 or lower on the Cumberland Ankle Instability Tool20 (CAIT), at least 2 ankle sprains in the past 6 months prior to the study HEA: 28 or higher on the CAIT and had no ankle sprain in the past year	history of ankle surgery	participants warmed up on treadmill, walked normally for 1 minute, walked with the sandbag external pertubations for 1 minute, then walked normally again without the sandbag for 1 minute	control subjects performed the same procedures	intervention: single sessions examination: pre, during, and post intervention	ankle frontal and sagittal plane position at baseline, during, and post intervention for pre-IC and post-IC	both groups became more everted and plantarflexed with the intervention ; the CAI group returned to a more inverted position after intervention while the healthy group was more everted in pre- and post-IC phases ; no sagittal plane differences
Effects of ankle destabilization devices and rehabilitation on gait biomechanics in chronic ankle instability patients: A randomized controlled trial	Donovan et al	2016	randomized control trial	8	external devices (specialized shoes for perturbations)	half boot with articulator beneath calcaneus for 45 degrees combined ankle motion, and full length sandal with articulator allowing for 30 degrees combined ankle motion	26 CAI subjects ; males and females	University/ surrounding community	history of more than one ankle sprain with the initial sprain occurring greater than one year ago, current self-reported functional deficits due to ankle symptoms that was qualified by a score of <85% on the FAAM Sport scale and a ≥11 on the IdFAI	ankle fracture, ankle surgery, an ankle sprain within the past 6 weeks, or any other current lower extremity pathology	4-week program for progressive impairment-based rehabilitation + walking with perturbation devices	4-week program for progressive impairment-based rehabilitation alone, no devices used	intervention: 4 weeks, 12 sessions examination: baseline, 4 weeks	anterior tibialis, medial gastroc, and peroneus brevis and longus EMG ; hip, knee, and ankle sagittal and frontal plane kinematics during gait ; hip, knee and ankle sagittal and frontal plane internal joint moments ; vGRFs	devices: decreased peroneus longus activation from 4-7% and 73-76% of gait, increased ankle dorsiflexion from 45-64% of gait compared to pre-rehab. No between group differences
Surface electromyography and plantar pressure changes with novel gait training device in participants with chronic ankle instability	Feger et al	2016	descriptive laboratory study	5	external device (elastic bands around ankles)	custom elastic band track with elastic bands around the distal shank for medially-directed force	10 CAI subjects ; males and females	University/ surrounding community	history ofmore than one ankle sprain with the initial sprain occurring greater than one year prior to study onset and no history of ankle sprain within 6 weeks of data collection ; ≤85% on the FAAM Sport scale and a score ≥10 on the IdFAI ; physically active (at least 20 min of exercise per day at least 3 days per week)	other lower extremity injuries or pathologies that would affect outcome measures	participants walked normally on treadmill with lab shoes with pressure insoles, and then preformed walking with the gait training device applied, and were collected once they felt used to the device	none	intervention: single session examination: baseline and during GT	plantar pressure time integral, peak pressure, time to peak pressure, contact area, and contact time ; center of pressure gait line ; EMG of the tib ant, peroneus longus, med gastroc, and glute med	the gait training resulted in lower mid and forefoot lateral pressure time integrals and peak pressure, and decreased lateral midfoot contact area, with increases in the total foot, medial forefoot, and hallux for pressure time integral, and total foot, heel, and hallux increased peak pressure. in all, pressure shifted medially
Effects of 2 Ankle Destabilization Devices on Electromyography Measures During Functional Exercises in Individuals With Chronic Ankle Instability	Donovan et al	2015	randomized cross-over trial	6	external devices (specialized shoes for perturbations)	half boot with articulator beneath calcaneus for 45 degrees combined ankle motion, and full length sandal with articulator allowing for 30 degrees combined ankle motion	15 CAI subjects ; males and females	University/ surrounding community	first ankle sprain greater than 1 year ago ; no ankle sprain within the past 6 weeks ; current self-reported function of less than 85% on the FAAM sports subscale ; at least 2 episodes of “giving way” or “instability” during daily activities or sport activities within the past 6 months	history of lower extremity surgery ; history of any illness that might have influenced neuromuscular control or impeded their ability to complete the functional exercises	participants first came to the lab to get familiarized to each shoe device, then came back within a week to perform treadmill walking in each shoe condition (control, sandal, and boot)	none	intervention: 2 sessions (familiarization, f/u) examination: during second session in each condition	tib ant, fib longus, lateral gastroc, rectus femoris, biceps femoris, and glute med EMG pre and post IC	both shoes increased pre-IC and post-IC peroneus longus activation, and higher % activation throughout the gait cycle. The boot resulted in a later reaction time for the tibialis anterior
Lower-Extremity Electromyography Measures During Walking With Ankle-Destabilization Devices	Donovan et al	2014	randomized cross-over trial	6	external devices (specialized shoes for perturbations)	half boot with articulator beneath calcaneus for 45 degrees combined ankle motion, and full length sandal with articulator allowing for 30 degrees combined ankle motion	15 healthy adults ; males and females	University/ surrounding community	healthy adults, males and females, without previous ankle sprains	history of lower-extremity injury or surgery ; history of any illness that might influence neuromuscular control or impede their ability to complete the walking tasks	participants first came to the lab to get familiarized to each shoe device, then came back within a week to perform treadmill walking in each shoe condition (control, sandal, and boot)	none	intervention: 2 sessions (familiarization, f/u) examination: during second session in each condition	tib ant, fib longus, lateral gastroc, rectus femoris, biceps femoris, and glute med EMG pre and post IC	both shoes increased the pre-IC activation for the tib ant, per long, and lateral gastroc than shod, increased post-IC activation of the per long, lateral gastroc, rectus fem, and biceps fem, with higher effect sizes in the boot condition. Both conditions caused the per long and lat gatroc to activate earlier, and the per long, lat gastroc, and rectus fem were activated for a longer % of gait
Effect of an unstable shoe construction on lower extremity gait characteristics	Nigg et al	2006	descriptive laboratory study	5	external device (specialized shoe for perturbations)	shoe with rounded sole in the A-P direction for an unstable base	8 healthy adults ; males and females	University/ surrounding community	free of lower-extremity pain and injury for a minimum of 6 months prior to testing and had never used the unstable shoe before	history of lower extremity injury or pain	participants were familiarized with the unstable shoes over a 2-week period, and then walked overground in the lab in control shoes and the unstable shoes for collection	none	intervention: 2 weeks examination: 2 week timepoint only	hip and knee rotation, frontal and sagittal plane motions ; ankle sagittal plane motion, and joint moments in all planes ; changes in EMG intensity for the tib ant, gastroc, vastus medialis, biceps fem, and glute med	Subjects had increased ankle dorsiflexion during early stance, there was a trend for a more inverted foot positioning, and there were no significant differences for EMG amplitudes of the muscles during walking
The Effects of an Ankle Destabilization Device on Muscular Activity while Walking	Forestier et al	2005	descriptive laboratory study	5	external device (specialized shoe for perturbations)	half boot with articulator beneath calcaneus for 45 degrees combined ankle motion	9 healthy subjects ; did not specify sex	University/ surrounding community	healthy adults without any history of ankle sprain	history of any musculoskeletal systemic disease	participants walked overground first in regular shoes, and then with the ankle destabilizing boot on the left leg only	none	intervention: single session examination: baseline and during boot walking	tibialis anterior, peroneus longus, peroneus brevis, medial and lateral gastroc EMG % activation ; and onset time	muscle activation was higher overall in the destabilizing boot for the tib ant, peroneus longus and brevis, but lower for the gastroc muscles ; muscles turned on earlier than in the control condition
N=9

## Sheet: Pedro Scores
PATELLOFEMORAL PAIN SCORES																				ACLR SCORES															ERLLP SCORES
Title	is combining…	the outcome of…	the influence of…	gait retraining versus…	gait retraining from…	the effect of gait…	patellofemoral joint stresses…	influence of step…	the effects of a multimodal…	The effect of real-time…	Influence of step…	Increasing running step rate…	Changes in muscle activation…	Effects of step length…	Mirror gait retraining…	the effects of forefoot…	effects of step rate…	AVG PEDRO SCORES		Gait Retraining After…	Assessment of gait symmetry…	Gait analysis of national…	Evaluation of gait kinematics…	Efficacy of gait training…	Gait and neuromuscular…	Muscle activity during…	Relationships between knee…	Lower body positive-pressure…	A kinematic comparison..	Electromyographic and…	Lower limb joint…	Kinematic Assessment…	AVG PEDRO SCORES		Gait retraining and…	Forefoot running improves…	primary and secondary…	immediate effects of…	kinetic changes during…	influence of tibial shock…	step frequency and…	a description of shock…	the effect of three…	in field gait retraining…	Lower limb joint…	Retraining running….	Gait retraining to reduce…	Reducing impact loading…	Effects of running speed…
Authors	Esculier 2017	Haim 2012	Bonacci 2017	Bonacci 2018	Roper 2017	Roper 2016	Vannatta 2014	Willson 2015	Esculier 2016	Noehren 2010	Lenhart 2015	Lenhart 2014	Chumanov 2013	Willson 2014	Willy 2012	dos Santos	Heiderscheit 2011			Decker 2004	Hadizadeh 2016	Hadizadeh 2016 (G&P)	Winiarski 2012	Teran-Yengle 2011	Riskowski 2010	Mercer 2014	Hartigan 2017	Eastlack 2005	Kilding 2007	Lange 1996	Miyoshi 2003	Millslagle 2006			Sharma 2014	Diebal 2012	Baggaley 2017	Chen 2016	Warne 2017	Clansey 2014	Hobara 2012	Mercer 2010	Boey 2017	Willy 2016	Telhan 2010	Creaby 2016	Crowell 2011	Crowell 2010	Edwards 2010
eligibility criteria specified?	1	1	1	1	1	1	1	1	1	1	1	1	1	1	1	1	1			1	1	1	1	1	1	1	1	1	1	1	1	1			1	1	1	1	1	1	1	1	1	1	1	1	1	1	1
where?	pg 2, participants	pg 596, patients	pg 2, methods	pg 458, methods	pg 1077, participants	pg 15, participants	pg 1002, methods, subjects	pg 737, methods para 2	pg 24, methods, participants	pg 692, participants	pg 3, methods	pg 2, participants	pg 2, subjects	pg 244, methods	pg 3, methods	pg 370, methods	pg 2, subjects			pg 849, participants	pg 998, participants	pg 153, subjects	pg 92, patients and controls	pg 949, subjects	pg 243 subejcts	pg 301, subjects	pg 357, participants	pg 214, materials and methods	pg 476, subjects	pg 295, subjects	pg 1220, materials	pg 611, participants			pg 1685-86, participants	pg 1061, patients	pg 502, materials and methods	pg 50, 2.1 subjects	pg 1539 participants	pg 974, participants	pg 310, participants	pg 260, participants	pg 168, participants	pg 198, M&M	pg 17, participants	pg 289, methods	pg3, subjects	pg 207, subjects	pg. 373, subjects
subjects randomly allocated to groups (in crossover study, subjects were randomly allocated in order treatments were received)?	1	0	1	1	1	1	1	1	0	0	1	1	1	1	0	1	1			1	0	0	0	0	0	0	1	1	0	1	0	1			1	0	1	0	1	1	1	0	0	1	1	1	0	0	1
where?	pg 2, randomization and blinding		pg 2, methods 2nd para	pg 458, methods, para 4	pg 1077, protocol	pg 15, protocol	pg 1002, methods, protocol	pg 737, fig 1	all received	all received	pg 3, methods	pg 3, experimental protocol	pg 2, experimental protocol	pg 244, methods, 2nd para rt column	all received	pg 370, methods	pg 3			pg 849, participants para 2							pg 357, participants	pg 214		pg 296, procedures (balanced presentation of speed)		pg 630 (randomly allocated to harness)			pg 1686, block randomized		pg 502, materials and methods		pg 1539 fig 1	pg 974, participants	pg 311, task and proc.			pg 198, M&M	pg 17, protocol	pg 289, methods			pg 373, experimental collection
allocation concealed?	1	0	0	1	1	1	0	0	0	0	0	0	0	0	0	0	0			0	0	0	0	0	0	0	0	0	0	0	0	0			1	0	0	0	0	0	0	0	0	1	0	0	0	0	0
where?	pg 2, randomization and blinding			pg 458, methods, para 3	pg 1077, protocol	pg 15, protocol																													pg 1686, sealed envelope									pg 198, M&M
groups similar at baseline regarding the most important prognostic indicators?	1	1	1	1	1	1	1	1	1	1	1	1	1	1	1	1	1			1	1	1	1	1	1	1	1	1	1	1	1	1			1	1	1	1	1	1	1	1	1	1	1	1	1	1	1
where?	pg 2, table 1, and in results pg 4 talked about covariate for age	pg 596, table 1	pg 2, table 1	pg 459, table 1	pg 1077, table 1	pg 15, table 1	pg 1003, results para 1	pg 738, results	table 1	pg 693, table 1	pg 23, table 1	pg 2 participants, pg 4 results	pg 2, subjects	pg 244, table 1	pg 16, table 1	table 1	pg 2, subjects			pg 850, group characteristics	pg 998, table 1	pg 153, subjects	pg 92, patients and controls	pg 949, subjects	pg 243 subjects	pg 301, subjects	table 1	pg 214, materials and methods	pg 476, subjects	pg 295, subjects	pg 1220, materials	pg 611, participants			pg 1686	pg 1063, table 1	502, materials and methods	pg 50, 2.1 subjects	pg 1542 table 2	pg 974, table 1	pg 310, participants	pg 260, participants	table 1	table 1	pg 17, participants	table 1	pg 4	pg 207, subjects	pg 373 subejcts
blinding of all subjects?	0	0	0	0	0	0	0	0	0	0	0	0	0	0	0	0	0			0	0	0	0	0	0	0	0	0	0	0	0	0			0	0	0	0	0	0	0	0	0	1	0	0	0	0	0
where?	not possible	not possible	not possible	not possible	not possible	not possible	not possible	not possible																																				pg 199
blinding of therapists administering tx?	0	0	0	0	0	0	0	0	0	0	0	0	0	0	0	0	0			0	0	0	0	0	0	0	0	0	0	0	0	0			0	0	0	0	0	0	0	0	0	0	0	0	0	0	0
where?	not possible	not possible	not possible	not possible	not possible	not possible	not possible	not possible
blinding of assessors who measured at least one key outcome?	1	0	0	1	0	0	0	0	0	0	0	0	0	0	0	0	0			0	0	0	0	0	0	0	0	0	0	0	0	0			1	0	0	0	0	0	0	0	0	0	0	0	0	0	0
where?	pg 2, study design			pg 458, methods, para 3																															pg 1688, outcomes
measures of at least one key outcome were obtained from more than 85% of the subjects initially allocated to groups?	1	1	1	1	1	1	1	1	1	1	1	1	1	1	0	1	1			1	1	1	1	1	1	1	1	1	1	1	1	1			0	1	1	1	1	0	1	1	1	1	1	1	1	1	1
where?	pg 3, fig 1	tables 2,3	table 2, fig 1	table 2	pg 1079, fig 1	pg 17, fig 2	results (16/17 completed)	pg 738, results (all completed)	pg 26, table 3	pg 693 results (all received)	pg 6, all completed	pg 4, results all completed	pg 4, results (all completed)	pg 245, results (all completed)	7/10 completed	pg 370, all participants completed	pg 2, subjects (all completed)			pg 850, group characteristics	all completed	all completed	pg 92, patients and controls (all completed)	pg 950, table (9/10 completed)	pg 243, all completed	all completed	all completed	all completed	all completed	all completed	all completed	all completed			0.83	all completed	all completed	all completed, single session	2 dropouts each group	12/15 for feedback group	all completed	all completed	all completed	all completed	all completed	all completed	all completed	all completed	all completed
intention to treat?	1	1	1	0	1	1	0	1	1	1	1	1	1	1	0	1	1			1	1	1	1	0	1	1	1	1	1	1	1	1			0	0	1	1	0	0	1	1	1	1	1	1	1	1	1
where?	pg 3, fig 1	patients	all participants completed	2 dropped, no f/u	all participants completed	all participants completed		pg 738, all completed	pg 26, all completed	pg 693, all completed	all completed	all completed	all completed	all completed		all completed	all completed			all completed	all completed	all completed	all completed		all completed	all completed	all completed	all completed	all completed	all completed	all completed					did not include subjects in outcome scores with unrelated injury	all completed	all completed, single session			all completed	all completed	all completed	all completed	all completed	all completed	all completed	all completed	all completed
the results of between-group statistical comparisons are reported for at least one key outcome	1	0	1	1	1	1	1	1	1	0	1	1	1	1	0	1	1			1	1	1	1	0	0	1	1	1	1	1	1	1			1	0	1	1	1	1	1	1	1	1	1	1	1	0	1
where?	tables 2, 3, 4	only intervention group	table 2, fig 1 (between-condition)	table 2	table 2, fig 2	fig 4	table 1	table 1, fig 2	success vs. non-success outcomes, table 3	one group only	fig 4	table 1	fig 1,2 and table 1	table 3	one group	table 2	tables 1-3			table 1-3	table 2	table 1	tables 1&2	one group	one group	figs 2-4	table 2	figs 2-6	table 1	tables 1&2	figs 1-4	table 1			figure 3		figs, table 1	table 3	tables 3-4	tables 2&3	fig 2	table	table 2	table 2	tables 1&2	fig 2	fig 5,6 table 1		tables1,2 fig 4
the study provides both point measures and measures of variability for at least one key outcome	1	1	1	1	1	1	1	1	1	1	1	1	1	1	1	1	1			1	1	1	1	1	1	1	1	1	1	1	1	1			1	1	1	1	1	1	1	1	1	1	1	1	1	1	1
where?	fig 2, tables 2, 3, 4	tables 2,3	table 2, fig 1	table 2	table 2, fig 2	table 2	table 1	table 1, fig 2	table 3, fig 1,	tables 2-5, figs 1-4	fig 4	table 1	fig 1,2 and table 1	table 3	table 2	table 2	tables 1-3			tables 1-3	table 2	table 1	tables 1&2	table	table 1, fig 3	figs 3&4	table 2	figs 2-6	table 1	tables 1&2	figs 1-4	table 1			pg 1689, results	table 2, results	figs, table 1	table 3	tables 3-4	tables 2&3	fig 2	table	table 2	table 2	tables 1&2	fig 2, table 1	fig 5,6 table 1	figs 3-6 ; table	tables 1,2
																		AVG SCORE
total score	8	4	6	7	7	7	5	6	5	4	6	6	6	6	2	6	6	5.70588	0	6	5	5	5	3	4	5	6	6	5	6	5	6	5.15385	0	6	3	6	5	5	4	6	5	5	8	6	6	5	4	6
[truncated: 16 more columns]
